# Supplementary material
Source: Springer Nature journal article supplement (https://www.springermedizin.de/resource/supplementary/13229_2012_41_MOESM5_ESM.pdf/9676072)

### 3' UTR NLGN3 Variants

chrX:70306922, 3'UTR SNV

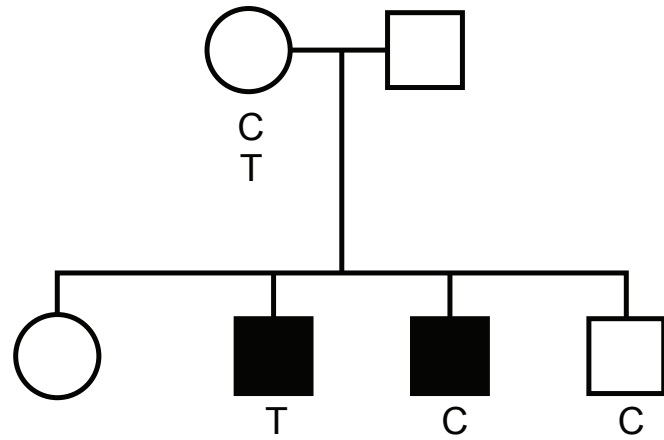

chrX:70306764, 3'UTR SNV  
chrX:70306767, 3'UTR SNV

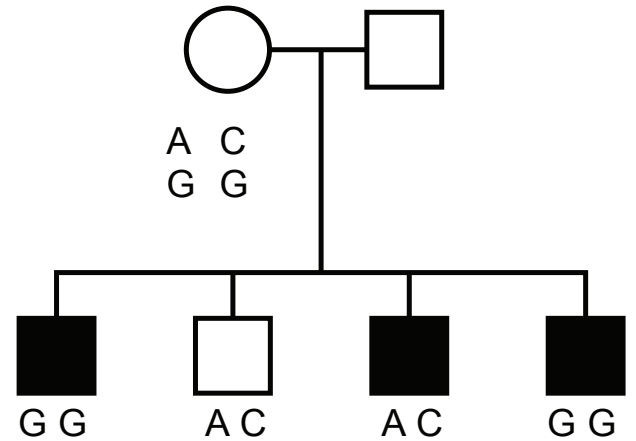

### 3' UTR NLGN4X Variants

chrX:5818136, 3'UTR SNV

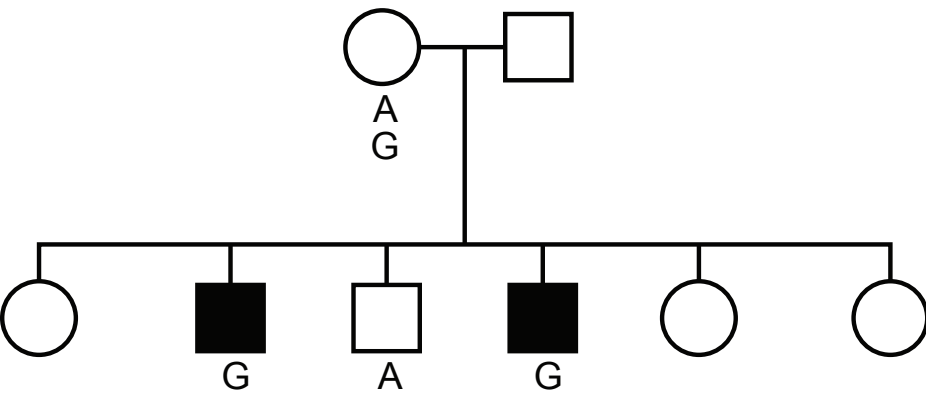

chrX:5820149-5820150, 3'UTR deletion

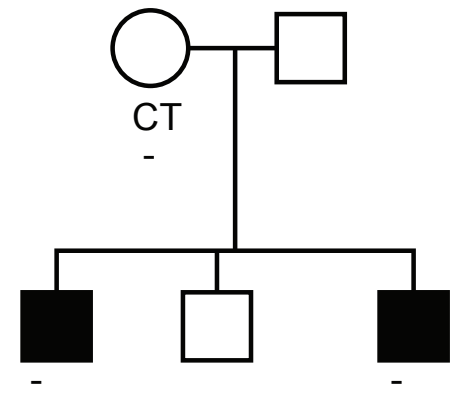

Supplement: MOESM5 [file 9676072]
